# Supplementary material
Source: Elsevier journal article supplement (https://www.sciencedirect.com/science/article/pii/S030105461630101X)
Supplement: mmc1 [file S030105461630101X:mmc1.docx]

**Table S1. Antibody panel for 4-colour B-cell phenotyping**

| Panel FITC PE percp-eflour710 APC |
| --- |
| B1 CD27 Anti-IgD Anti-IgM CD19 |
| B2 CD38 CD21 Anti-IgM CD19 |

**Abbreviations:** APC: Allophycocyanin, FITC: Fluorescein isothiocyanate, PE: Phycoerythrin, PerCp: peridinin chlorophyll protein -eFluor710
